# Supplementary material for: A tetranuclear Mn-diamond core complex as a functional mimic of both catechol oxidase and phenoxazinone synthase enzymes
Source: Royal Society of Chemistry journal article supplement (doi:10.1039/d3dt00761h), 2023-01-01
Supplement: d3dt00761h1.pdf [file d3dt00761h1.pdf]

## A tetranuclear Mn-diamond core complex as a functional mimic of both catechol oxidase and phenoxazinone synthase enzymes

Rakesh Kumar, Rahul Keshri, Koushik Prodhan, Kanchan Shaikh, and Apparao Draksharapu\*

Southern Laboratories-208A, Department of Chemistry, Indian Institute of Technology, Kanpur – 208016, India.  
Email: [appud@iitk.ac.in](mailto:appud@iitk.ac.in)

### Experimental Section:

#### X-ray crystallography

Single-crystal of suitable dimensions was used for data collection. Diffraction intensities were collected on a Bruker D8 Venture Duo X-ray diffractometer<sup>1</sup> and software suite CCD diffractometer, with graphite-monochromated Mo K $\alpha$  (0.71073 Å) radiation at 100 K. Data were corrected for Lorentz and polarization effects; empirical absorption corrections (SADABS v 2.10) were applied. Using Olex2,<sup>2</sup> the structures were solved by ShelXT<sup>3</sup> structure solution program using Intrinsic Phasing and refined with the ShelXL<sup>4</sup> refinement package using Least Squares minimization. The non-hydrogen atoms were refined anisotropically, whereas the H atoms fixed to their geometrically ideal positions were refined isotropically. CCDC **2182342** contains the supplementary crystallographic data for **1**. This data can be obtained free of charge from the Cambridge Crystallographic Data Centre via [www.ccdc.cam.ac.uk](http://www.ccdc.cam.ac.uk).

#### Synthesis of Mn Dimer, [Mn<sup>II</sup><sub>2</sub>(HPTP\*)]<sup>3+</sup> (**3**):

To a 2 mL solution of 1,3-bis(bis((4-methoxy-3,5-dimethylpyridin-2-yl)methyl)amino)propan-2-ol (HPTP\*H) ligand (105 mg, 0.15 mmol) in acetonitrile, a 2 mL CH<sub>3</sub>CN solution of [Mn<sup>II</sup>(H<sub>2</sub>O)](ClO<sub>4</sub>)<sub>2</sub> (110 mg, 0.30 mmol) was added dropwise with stirring in nitrogen filled glove box. The reaction mixture was stirred of 3 h at room temperature. Excess diethyl ether was poured in the reaction mixture and decanted. The obtained off white solid of **3** washed thrice with Et<sub>2</sub>O (3 X 30 mL). UV-Vis absorption spectrum of this complex showed band at 263 nm with  $\epsilon = 14400 \text{ M}^{-1}\text{cm}^{-1}$  (Figure S22A). ESI-MS of the complex giving m/z = 929.20 and 993.18, for the formulation [Mn<sub>2</sub>(HPTP\*)(Cl)(ClO<sub>4</sub>)]<sup>+</sup> and [Mn<sub>2</sub>(HPTP\*)(ClO<sub>4</sub>)<sub>2</sub>]<sup>+</sup>, respectively (Figure S22B). Solution state EPR also confirms the presence of Mn in +2 oxidation state (Figure S22C). However, our efforts to recrystallize this complex were unsuccessful.

#### Synthesis of [Mn<sub>4</sub>(tpdp)<sub>2</sub>(O)<sub>2</sub>(H<sub>2</sub>O)<sub>4</sub>](ClO<sub>4</sub>)<sub>5</sub>·4H<sub>2</sub>O (**4**):

Synthesis of **4** was carried out as reported procedure by Akira *et. al.*<sup>5</sup> Htpdp is 1,3-bis[bis(2-pyridylmethyl)amino]-2-propanol.

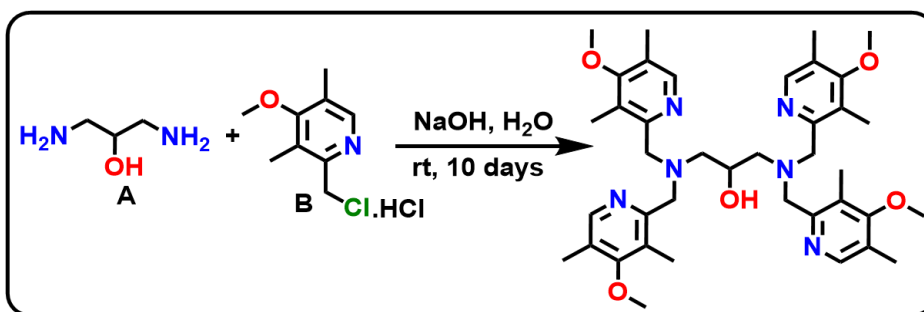

**Scheme S1:** Synthetic procedure for HPTP\*H ligand.

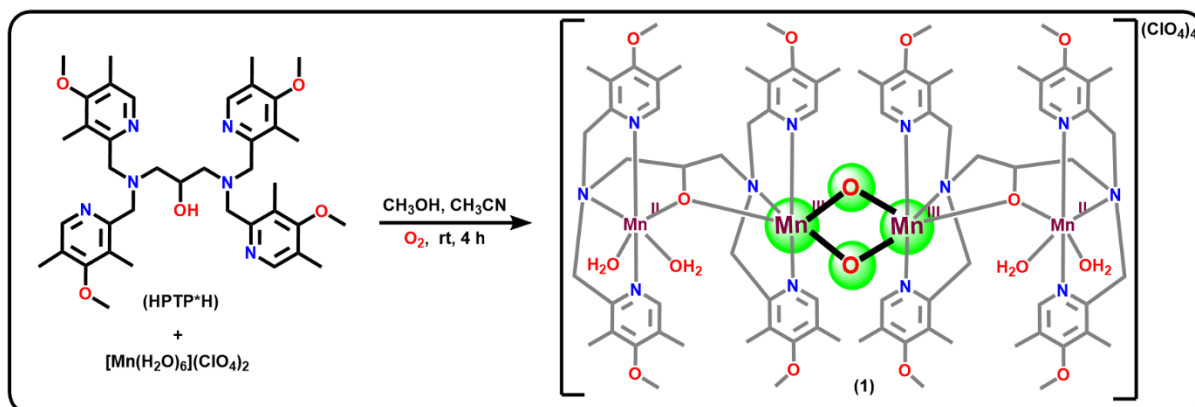

**Scheme S2:** Synthetic procedure for 1.

**Synthesis of *N,N,N',N'*-tetrakis(2-quinolylmethyl)-2-hydroxy-1,3-propanediamine (Htqhpn):** Ligand synthesis was carried out as reported procedure by Mikata *et. al.*<sup>6</sup>

<sup>1</sup>H NMR (400 MHz, CDCl<sub>3</sub>): δ 8.02 (d, 4H), 7.92 (d, 4H), 7.69 (d, 4H), 7.66-7.62 (m, 4H), 7.48-7.44 (m, 8H), 4.16 (m, 9H) 2.83 (m, 4H). <sup>13</sup>C NMR (100 MHz, CDCl<sub>3</sub>): δ 159.06, 147.20, 136.75, 129.67, 128.77, 127.59, 127.38, 126.40, 121.18, 67.20, 61.40, 59.22 ppm.

**Synthesis of [Mn<sub>4</sub>(tqhpn)<sub>2</sub>(μ-O)<sub>2</sub>(H<sub>2</sub>O)<sub>2</sub>(DMF)<sub>2</sub>·(ClO<sub>4</sub>)<sub>4</sub>·4H<sub>2</sub>O (2·4H<sub>2</sub>O):** 2: Synthesis of 2 was carried out as reported procedure by Mikata *et. al.*<sup>6</sup>

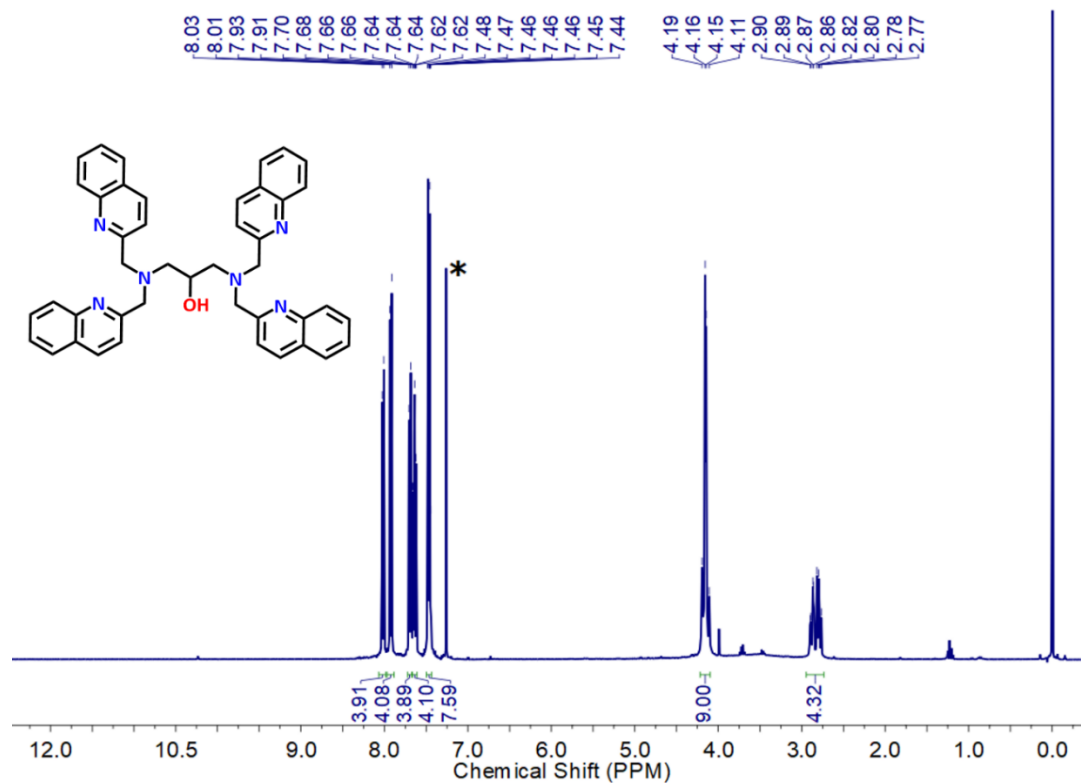

**Figure S1:**  $^1\text{H}$  NMR spectrum of *N,N,N',N'*-tetrakis(2-quinolylmethyl)-2-hydroxy-1,3-propanediamine (Htqhpn) in  $\text{CDCl}_3$  at 400 MHz. (\* $\text{CDCl}_3$  residual peak)

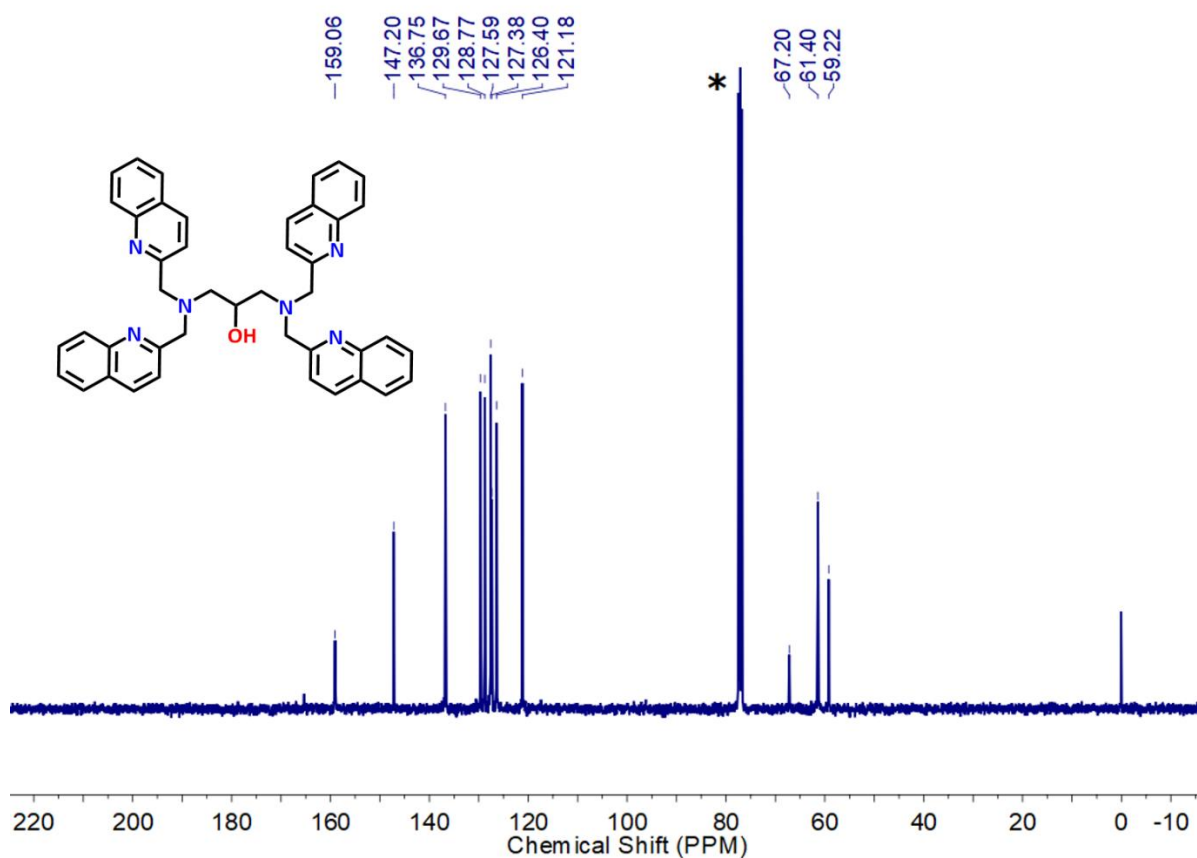

**Figure S2:**  $^{13}\text{C}$  NMR spectrum of *N,N,N',N'*-tetrakis(2-quinolylmethyl)-2-hydroxy-1,3-propanediamine (Htqhpn) in  $\text{CDCl}_3$  at 100 MHz. (\* $\text{CDCl}_3$  residual peak)

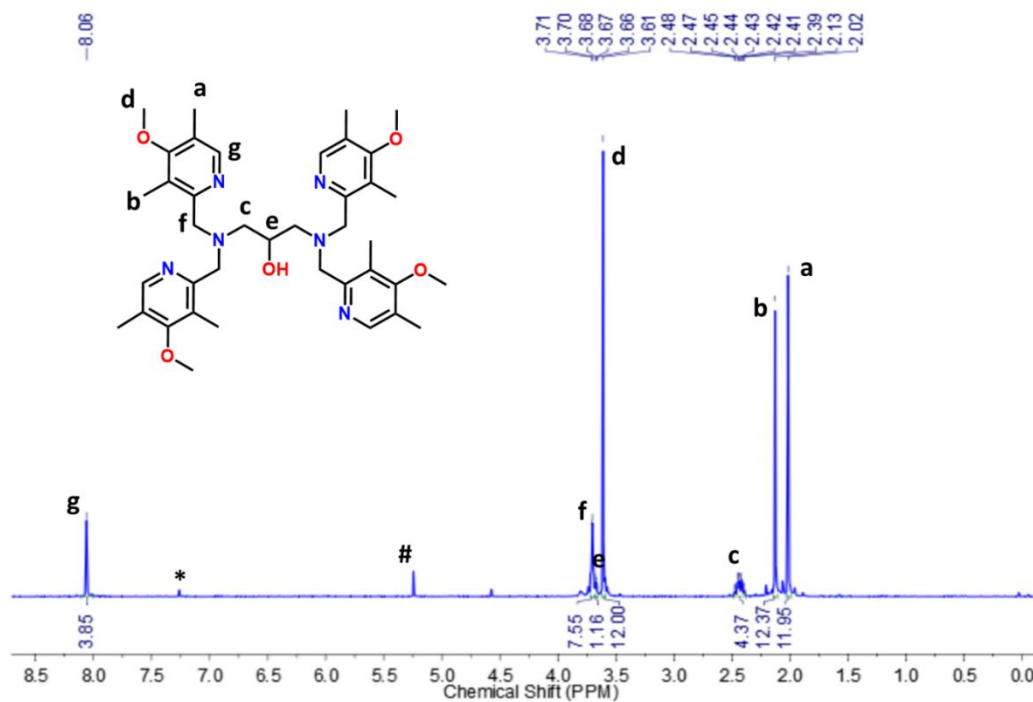

**Figure S3:** <sup>1</sup>H NMR spectrum of 1,3-bis(bis((4-methoxy-3,5-dimethylpyridin-2-yl)methyl)amino)propan-2-ol (HPTP\*H) in CDCl<sub>3</sub> at 500 MHz. (\*CDCl<sub>3</sub> residual peak, # peak for dichloromethane solvent)

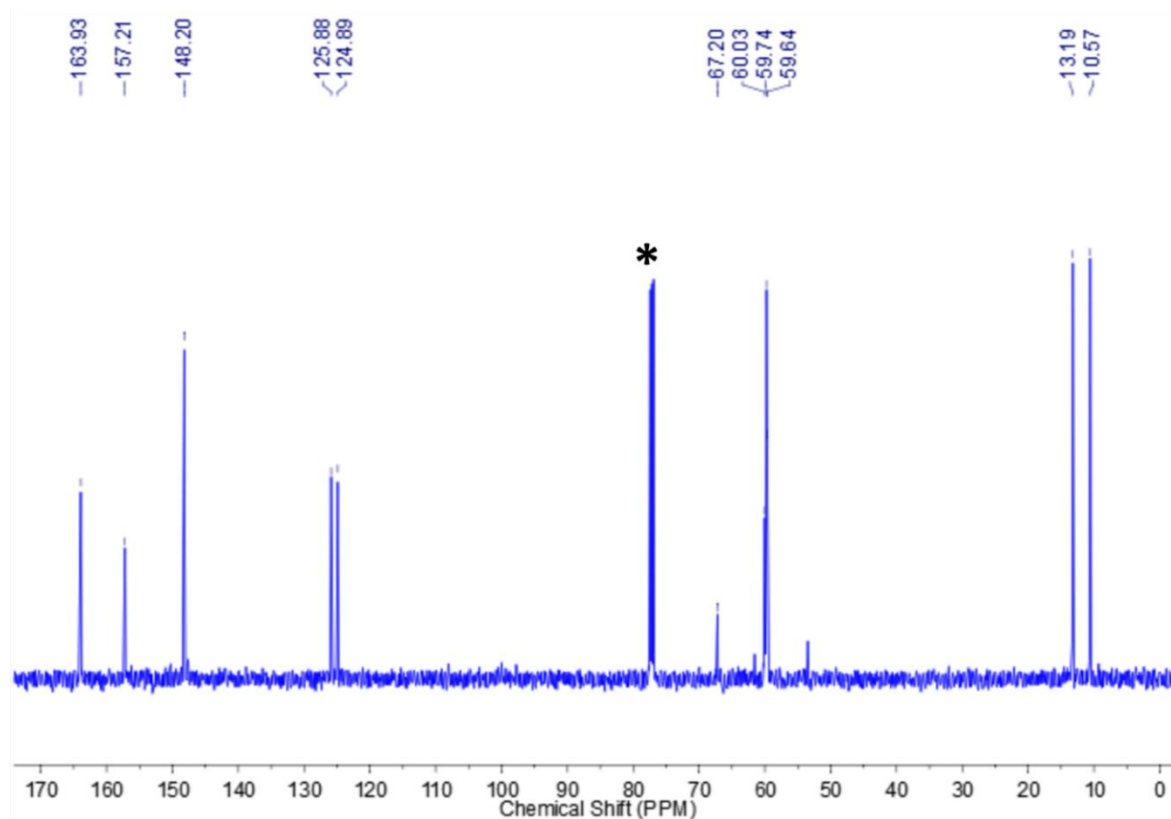

**Figure S4:** <sup>13</sup>C NMR spectrum of 1,3-bis(bis((4-methoxy-3,5-dimethylpyridin-2-yl)methyl)amino)propan-2-ol (HPTP\*H) in CDCl<sub>3</sub> at 125 MHz. (\*CDCl<sub>3</sub> residual peak)

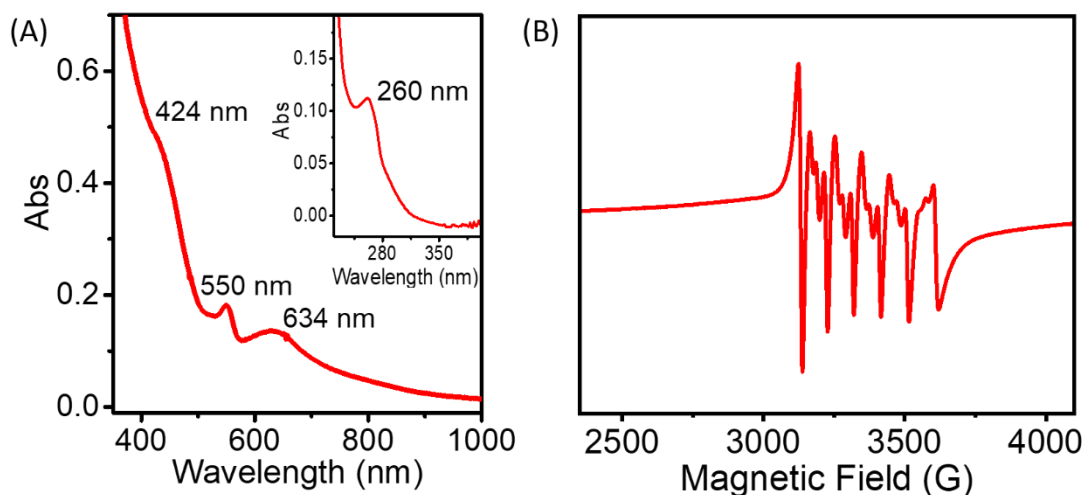

**Figure S5:** (A) UV-Vis absorption spectrum of 0.25 mM **1** in CH<sub>3</sub>CN at room temperature. Inset: UV-Vis absorption spectrum of 5 μM **1** in CH<sub>3</sub>CN. (B) X-band EPR spectrum of **1** (in MeOH with a few drops of toluene) measured at 120 K; modulation amplitude 1.98 G, modulation frequency 100 kHz, and microwave frequency 9.466 GHz.

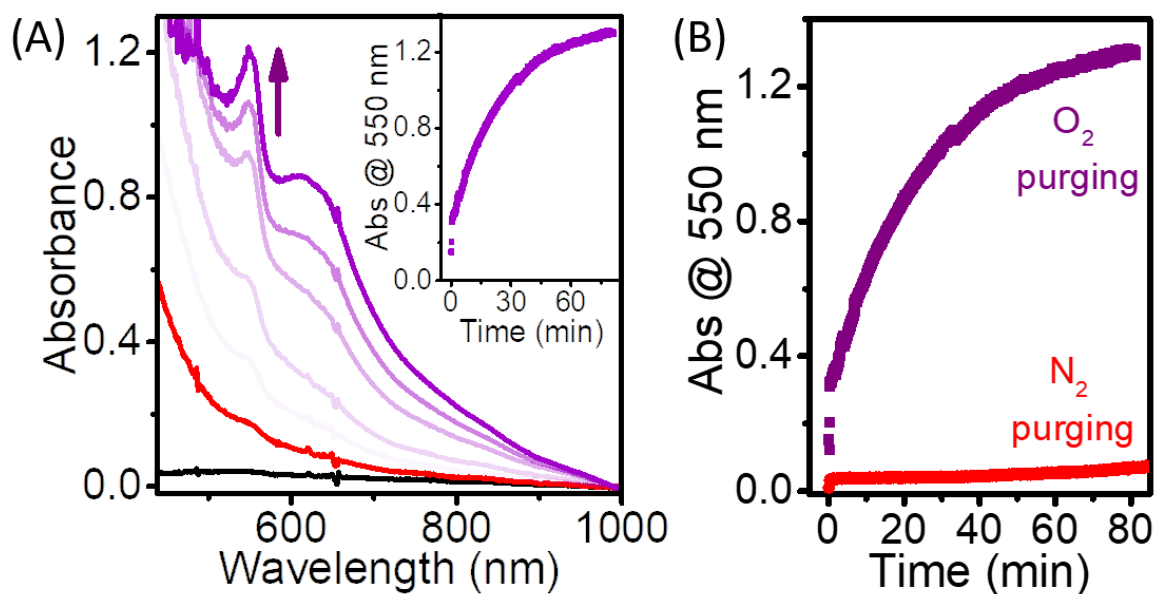

**Figure S6.** (A) Formation of **1** followed by UV-Vis absorption spectroscopy upon the reaction of HPTP\*H (red) with [Mn<sup>II</sup>(H<sub>2</sub>O)<sub>6</sub>](ClO<sub>4</sub>)<sub>2</sub> (black) in CH<sub>3</sub>CN at room temperature with dioxygen purging. Inset: The corresponding change in the absorption at 550 nm. (B) Changes observed at 550 nm over time in the presence (purple) and absence of (red) dioxygen.

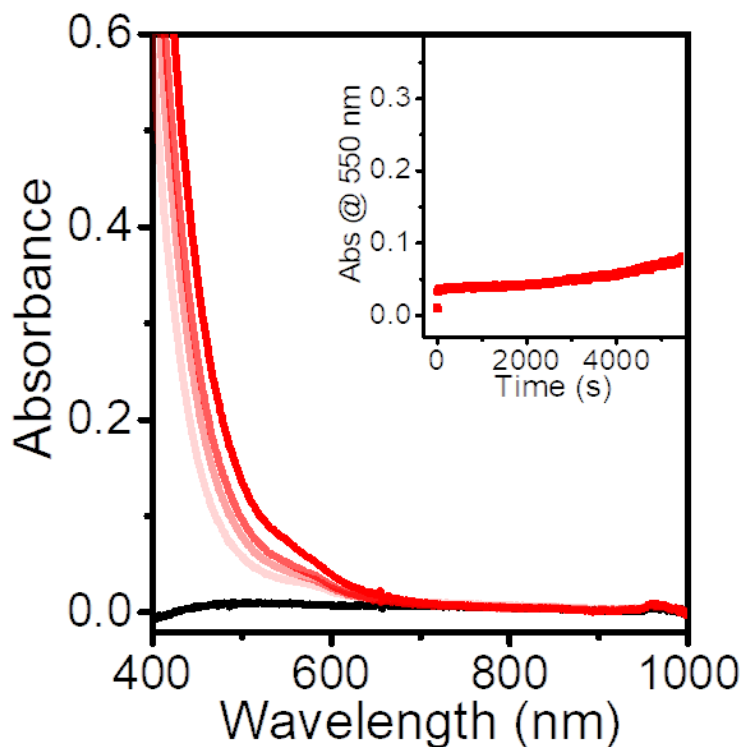

**Figure S7.** UV-Vis absorption spectral changes observed upon adding HPTP\*H to  $[Mn^{II}(H_2O)_6](ClO_4)_2$  (black) in  $CH_3CN$  at room temperature with  $N_2$  purging. Inset: The corresponding change in the absorption at 550 nm over time.

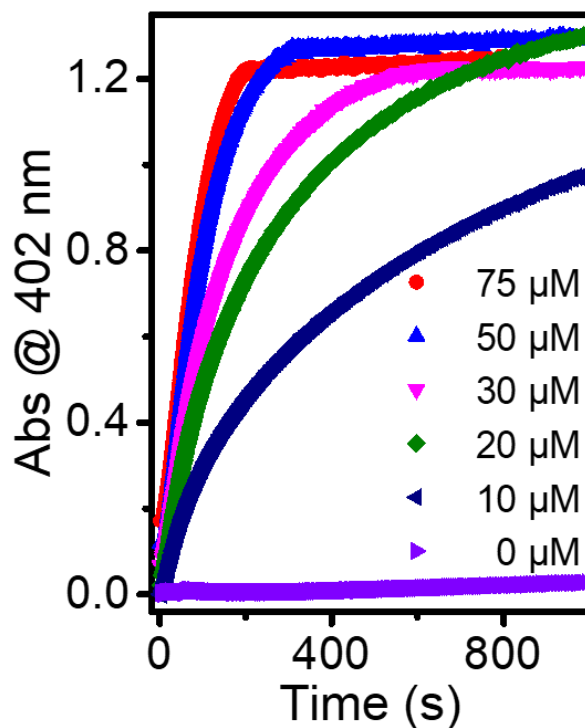

**Figure S8:** UV-Vis absorption changes observed at 402 nm with time during the reaction of 1 mM 3,5-DTBC with **1** at various concentrations 75  $\mu M$  (red), 50  $\mu M$  (blue), 30  $\mu M$  (magenta), 20  $\mu M$  (green), 10  $\mu M$  (dark blue) and 0  $\mu M$  (purple) in acetonitrile.

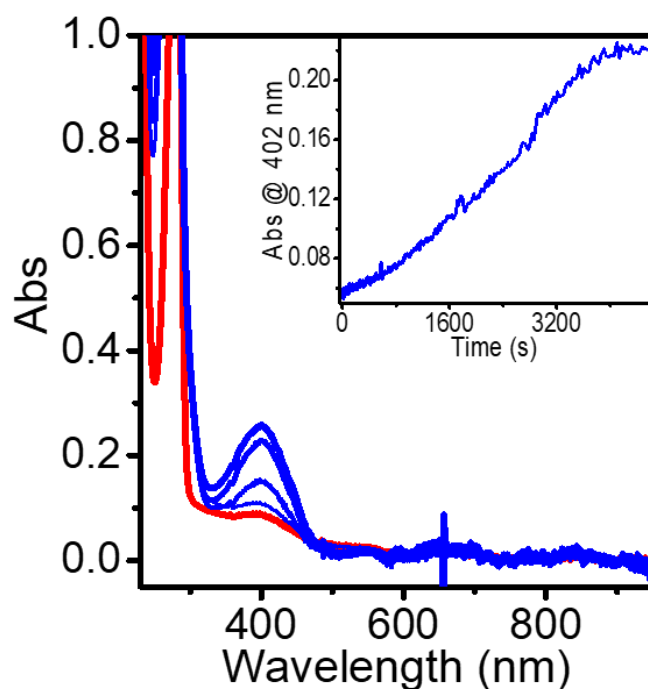

**Figure S9:** Time-dependent UV-Vis absorption spectral changes upon the reaction of 1 mM 3,5-DTBC with **1** (0.03 mM) in  $\text{CH}_3\text{CN}$  under nitrogen atmosphere. Inset: The corresponding changes in the absorption at 402 nm over time in seconds.

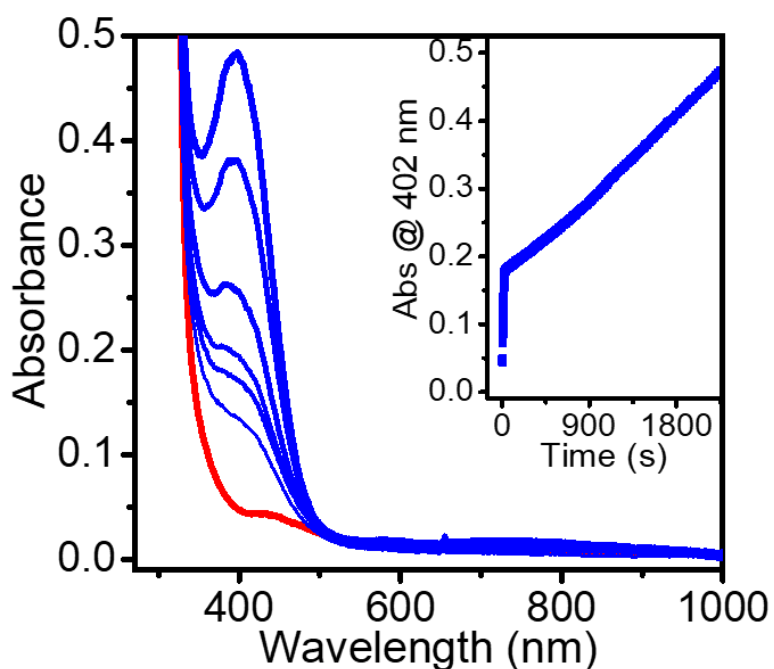

**Figure S10:** Time-dependent UV-Vis absorption spectral changes upon the reaction of 1 mM 3,5-DTBC with **2** (0.10 mM) in  $\text{CH}_3\text{CN}$  under open air atmosphere. Inset: The corresponding changes in the absorption at 402 nm over time in seconds. *Reaction condition:* Stock of **2** (4 mM in DMF), 3,5 DTBC (100 mM in  $\text{CH}_3\text{CN}$ ) prepared. To a 2 mL  $\text{CH}_3\text{CN}$  in a cuvette 3,5-DTBC (20  $\mu\text{L}$ , 100 mM) and **2** (4 mM, 15  $\mu\text{L}$ ) were added.

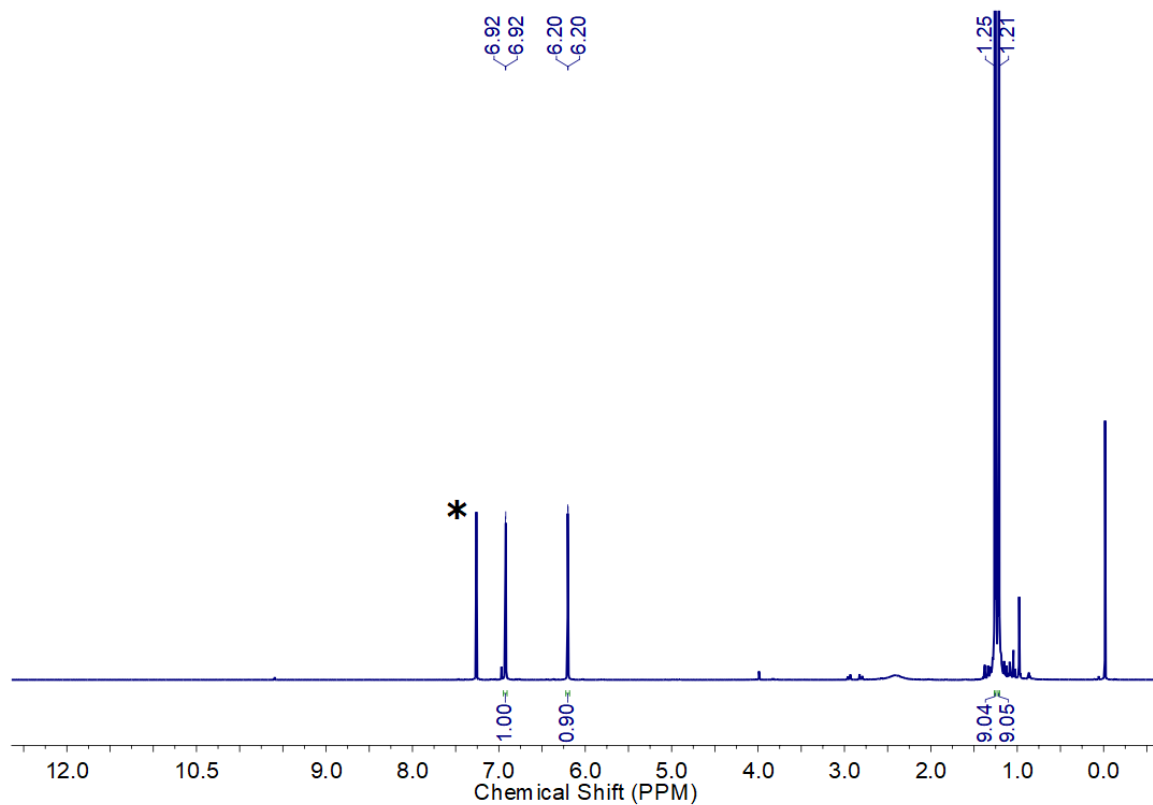

Figure S11:  $^1\text{H}$  NMR of 3,5-DTBQ. (\* $\text{CDCl}_3$  residual peak)

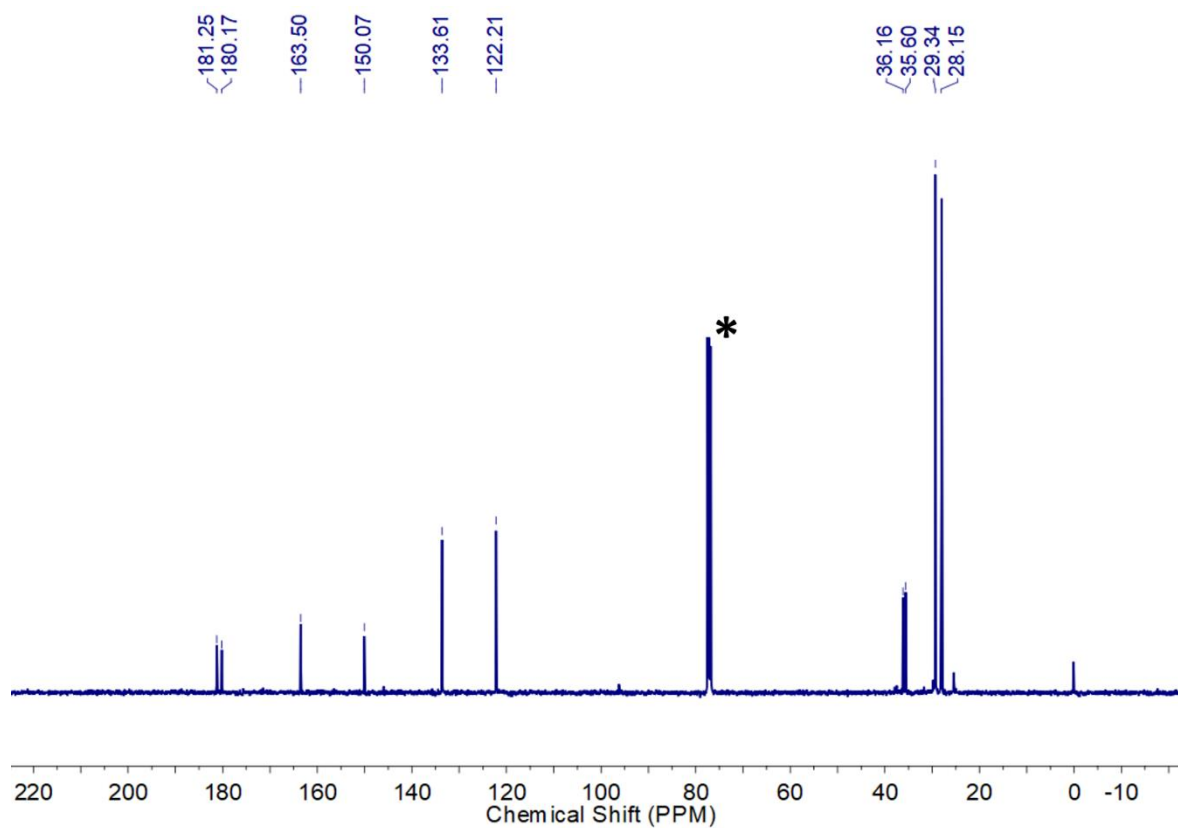

Figure S12:  $^{13}\text{C}$  NMR of 3,5-DTBQ. (\* $\text{CDCl}_3$  residual peak)



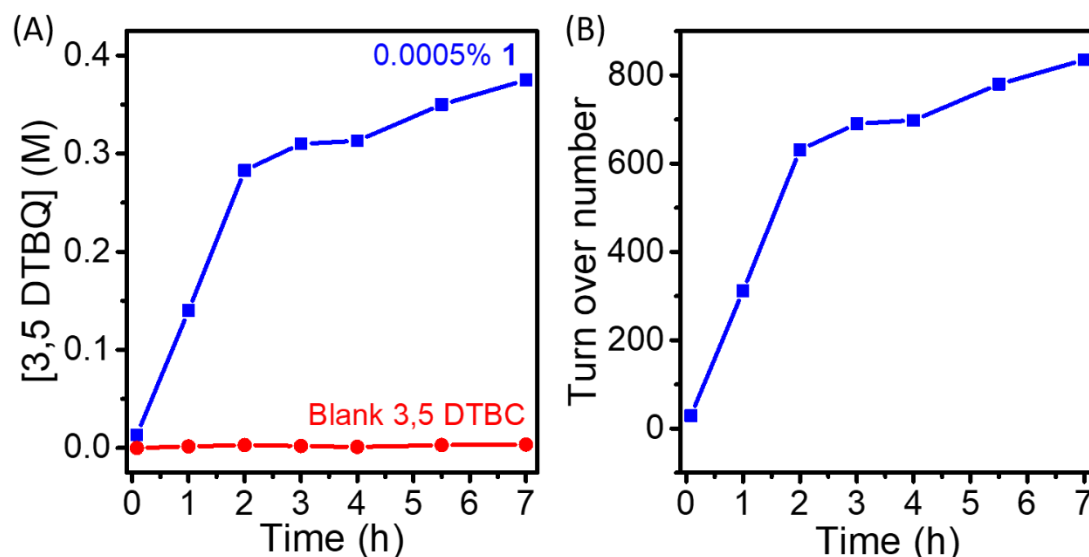

**Figure S13:** Reaction of 3,5-DTBC with **1** in CH<sub>3</sub>CN under open air atmosphere monitored using UV-Vis absorption spectroscopy. (A) Plot of concentration of 3,5-DTBQ (in molar) vs. time (in hours). (Blue) 0.0005% catalyst **1** loading, (Red) in absence of catalyst **1**. (B) Plot of turn over number vs. time (in hours) of the reaction conducted in the aerobic conditions.

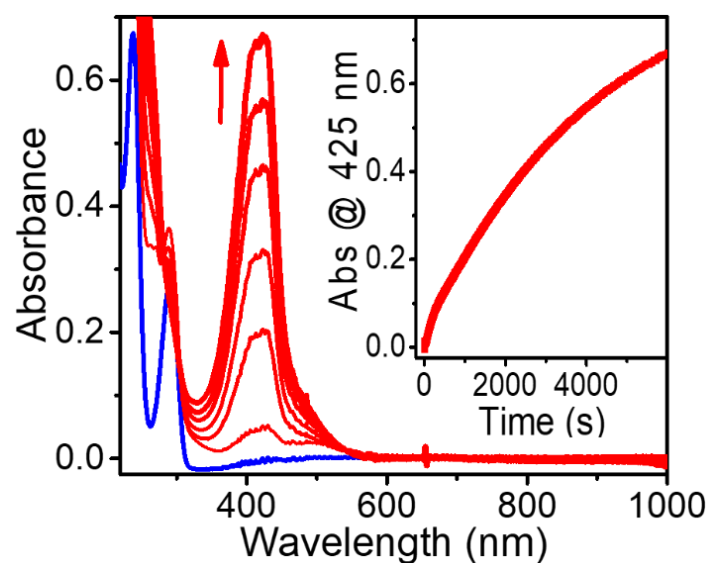

**Figure S14.** Time-dependent UV-Vis absorption spectral changes upon the reaction of **1** (10 μM) with 0.1 mM 2-aminophenol in CH<sub>3</sub>CN in open air atmosphere. Inset: The corresponding changes in the absorption at 425 nm over time in seconds.

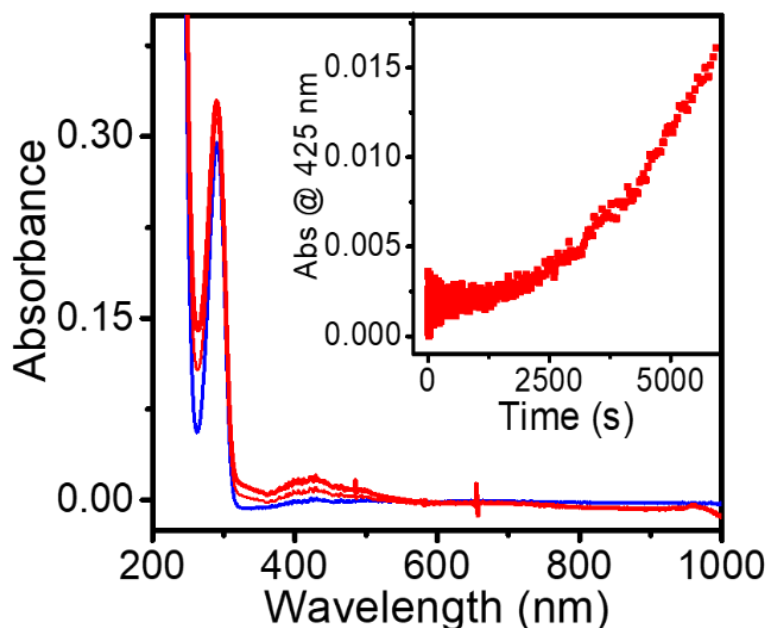

**Figure S15.** Time-dependent UV-Vis absorption spectral changes upon purging O<sub>2</sub> to 0.1 mM 2-aminophenol in CH<sub>3</sub>CN. Inset: Corresponding changes in the absorption at 425 nm over time in seconds.

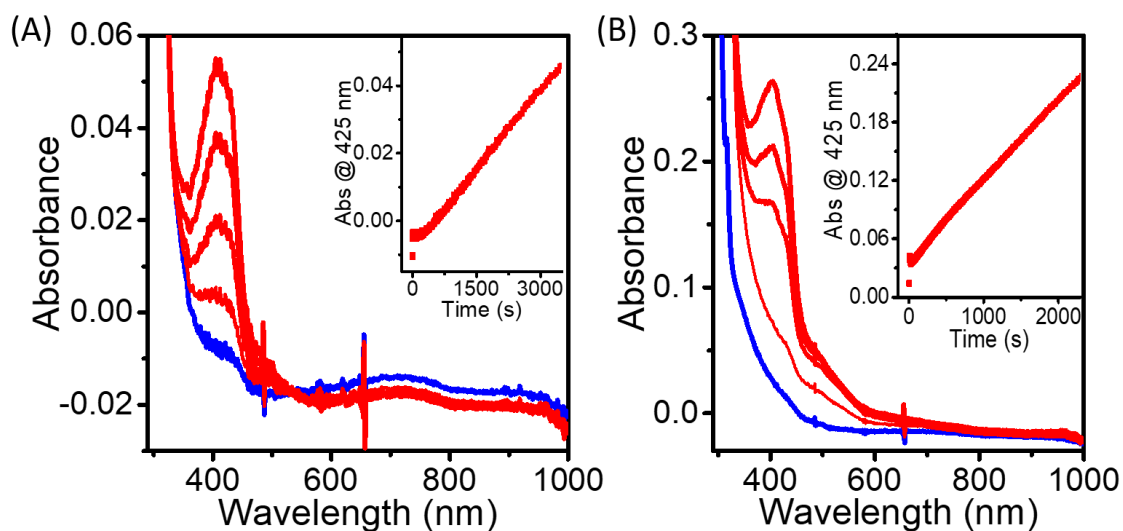

**Figure S16.** Time-dependent UV-Vis absorption spectral changes upon (A) the reaction of 0.01 mM **2** with 0.1 mM 2-aminophenol under constant purging of O<sub>2</sub> in CH<sub>3</sub>CN. Inset: The corresponding changes in the absorption at 425 nm over time in seconds. *Reaction condition:* Stock solutions of **2** (4 mM in DMF), and 2-aminophenol (10 mM in CH<sub>3</sub>CN) were prepared. 3 mL CH<sub>3</sub>CN taken in a cuvette to which (30  $\mu$ L, 10 mM) 2-aminophenol and (4 mM, 7.5  $\mu$ L) **2** were added. (B) The reaction of 0.05 mM **2** with 0.1 mM 2-aminophenol under constant purging of O<sub>2</sub> in CH<sub>3</sub>CN. Inset: The corresponding changes in the absorption at 425 nm over time in seconds. *Reaction condition:* Stock solutions of **2** (4 mM in DMF), and 2-aminophenol (10 mM in CH<sub>3</sub>CN) were prepared. 3 mL CH<sub>3</sub>CN taken in a cuvette to which 2-aminophenol (30  $\mu$ L, 10 mM) and **2** (4 mM, 37.5  $\mu$ L) were added.

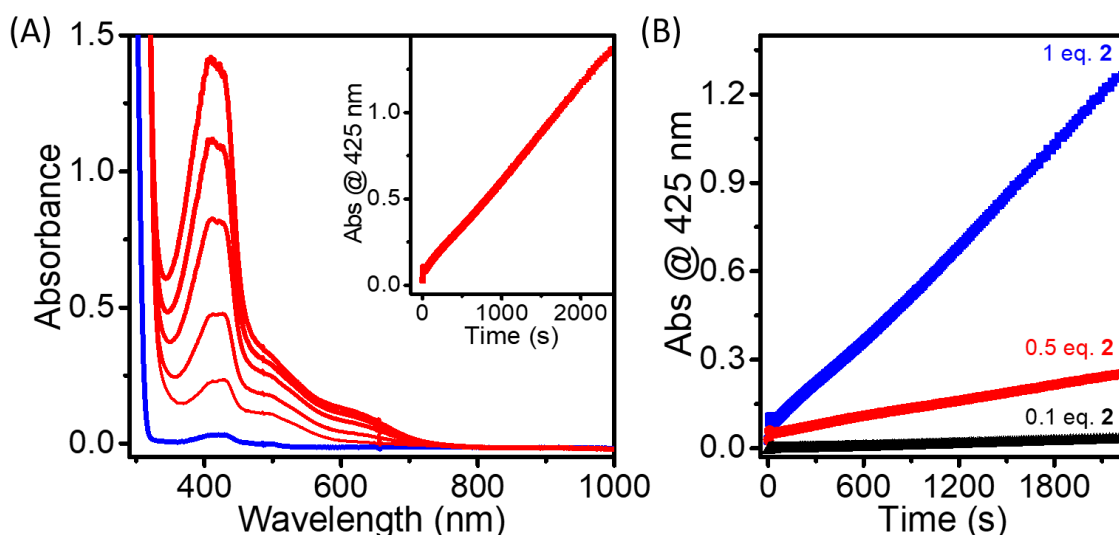

**Figure S17.** (A) Time-dependent UV-Vis absorption spectral changes upon reaction of 0.1 mM **2** and 0.1 mM 2-aminophenol with purging of O<sub>2</sub> in CH<sub>3</sub>CN. Inset: The corresponding changes in the absorption at 425 nm over time in seconds. *Reaction condition:* Stock solutions of **2** (4 mM in DMF), and 2-aminophenol (10 mM in CH<sub>3</sub>CN) were prepared. To 3 mL CH<sub>3</sub>CN in a cuvette, 2-aminophenol (30  $\mu$ L, 10 mM) and **2** (4 mM, 75  $\mu$ L) were added. (B) The changes observed at 425 nm upon adding different equivalents of **2** to 0.1 mM 2-aminophenol (blue) 1 eq. (0.1 mM), (red) 0.5 eq. (0.05 mM) and (black) 0.1 eq. (0.01 mM)

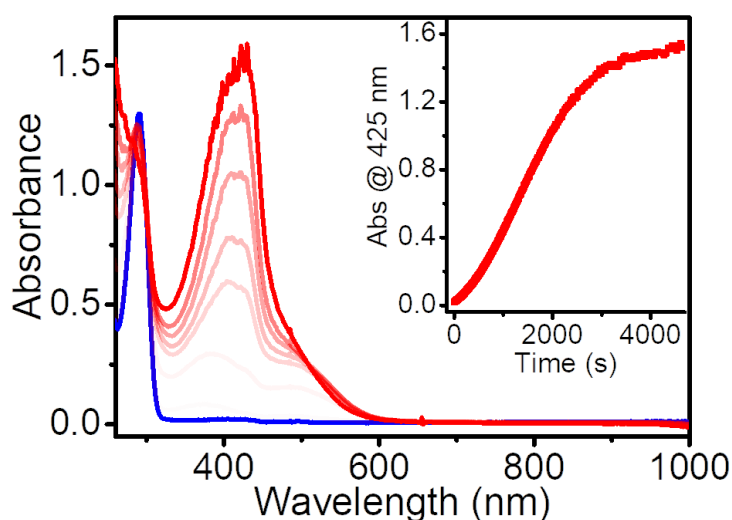

**Figure S18:** Time-dependent UV-Vis absorption spectral changes upon the reaction of 5  $\mu$ M **1** and 0.5 mM 2-aminophenol under constant purging of O<sub>2</sub> in CH<sub>3</sub>CN at 40 °C. Inset: The corresponding changes in the absorption at 425 nm over time in seconds. *Reaction condition:* Stock solutions of **1** (1 mM in CH<sub>3</sub>CN) and 2-aminophenol (100 mM in CH<sub>3</sub>CN) were prepared. To a 3 mL CH<sub>3</sub>CN in a cuvette, 2-aminophenol (15  $\mu$ L, 100 mM) and **1** (1 mM, 15  $\mu$ L) were added.

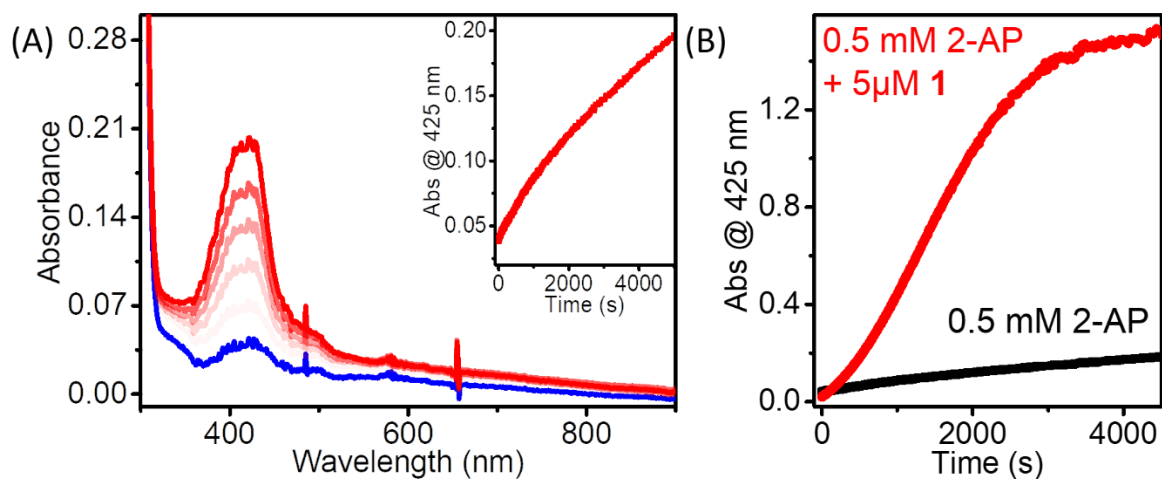

**Figure S19:** (A) Time-dependent UV-Vis absorption spectral changes upon treating 0.5 mM 2-aminophenol with O<sub>2</sub> (purging) in CH<sub>3</sub>CN at 40 °C. Inset: The corresponding changes in the absorption at 425 nm over time in seconds. (B) Time trace at 425 nm for catalytic reaction of 0.5 mM 2-aminophenol with 5 μM **1** (red) and only 0.5 mM 2-aminophenol (black) with purging O<sub>2</sub> in CH<sub>3</sub>CN at 40 °C. *Reaction condition:* 2-aminophenol (100 mM in CH<sub>3</sub>CN) stock prepared. To a 3 mL CH<sub>3</sub>CN in a cuvette 2-aminophenol (15 μL, 100 mM) was added.

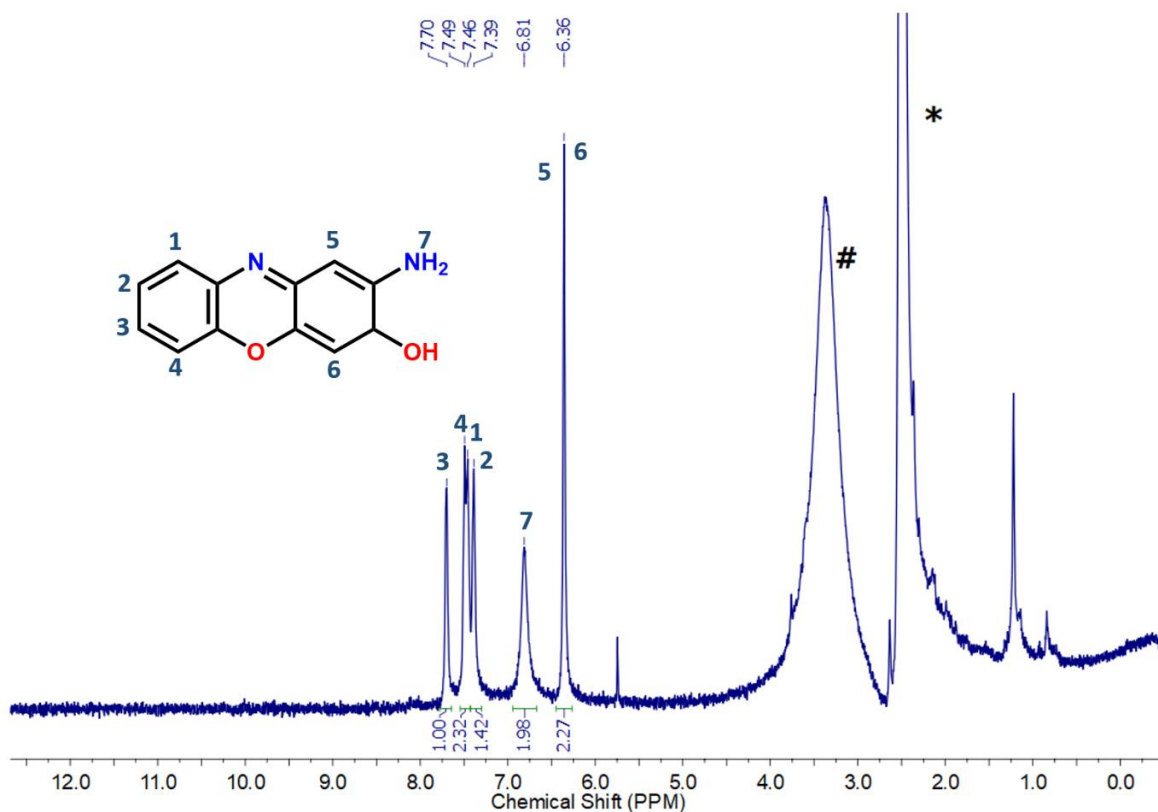

**Figure S20:** <sup>1</sup>H NMR of 2-amino-3H-phenoxazin-3-one. (\*DMSO-d<sub>6</sub> residual peak, # peak for H<sub>2</sub>O in DMSO-d<sub>6</sub>)

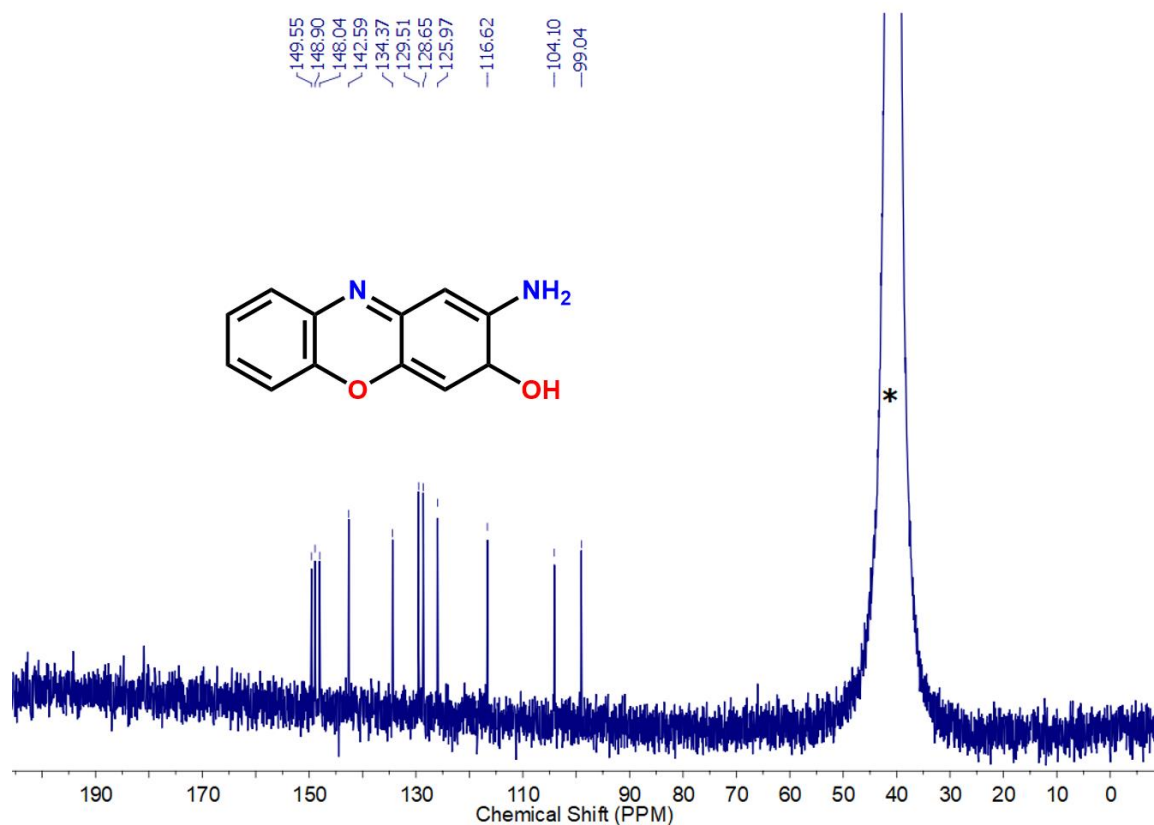

**Figure S21:**  $^{13}\text{C}$  NMR of 2-amino-3*H*-phenoxazin-3-one. (\*DMSO- $d_6$  residual peak)

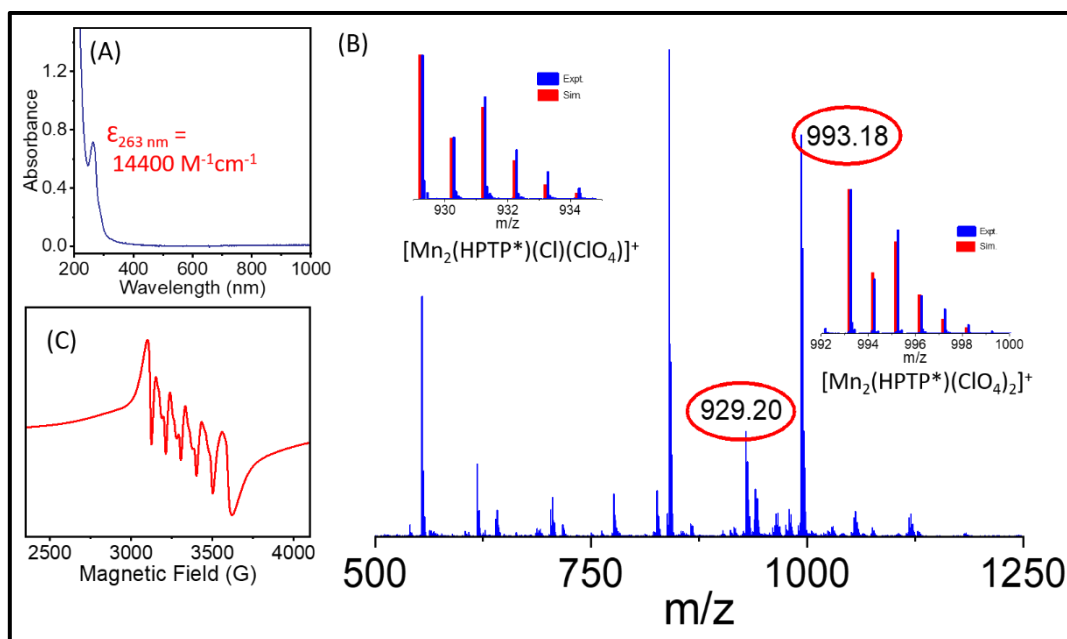

**Figure S22:** (A) UV-Vis absorption spectrum of 0.05 mM Mn dimer,  $[\text{Mn}^{\text{II}}_2(\text{HPTP}^*)]^{3+}$ , **3** in  $\text{CH}_3\text{CN}$ . (B) ESI-MS of **3** in  $\text{CH}_3\text{CN}$ . (C) X-band EPR spectrum of **3** in solution state measured in MeOH with a few drops of toluene at 120 K; modulation amplitude 1.98 G, modulation frequency 100 kHz, and microwave frequency 9.466 GHz.

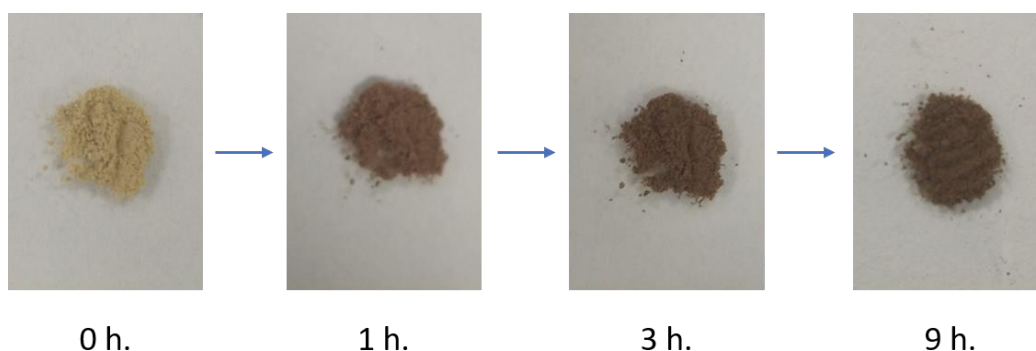

**Figure S23:** Conversion of  $\text{Mn}_2(\text{II})$  dimer,  $[\text{Mn}^{\text{II}}_2(\text{HPTP}^*)]^{3+}$ , (**3**) to **1** upon the exposure to open air.

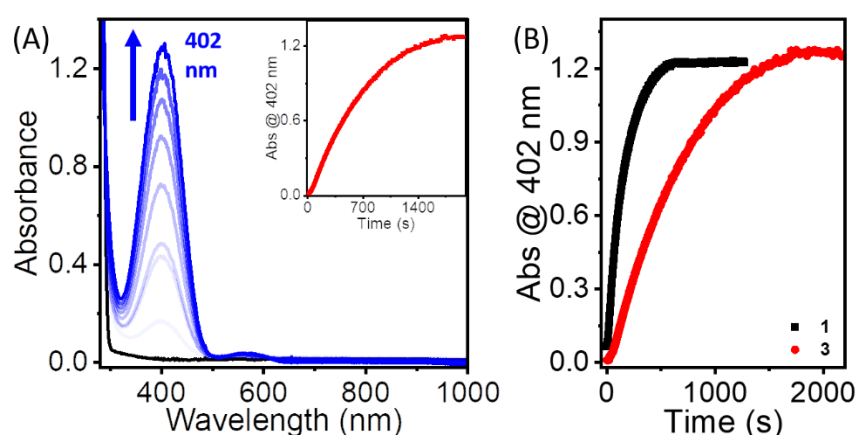

**Figure S24:** (A) Time-dependent UV-Vis absorption spectral changes upon the reaction of 1 mM 3,5-DTBC with  $[\text{Mn}^{\text{II}}_2(\text{HPTP}^*)]^{3+}$ , **3** ( $60 \mu\text{M}$ ) in  $\text{CH}_3\text{CN}$  under aerobic condition. Inset: The corresponding changes in the absorption at 402 nm due to the formation of 3,5-DTBQ over time (in seconds). (B) Comparison of the rate of reaction monitored using 402 nm (due to the formation of 3,5-DTBQ over time) for the reaction of 3,5-DTBC with **1** (black) and  $[\text{Mn}^{\text{II}}_2(\text{HPTP}^*)]^{3+}$ , **3** (red).

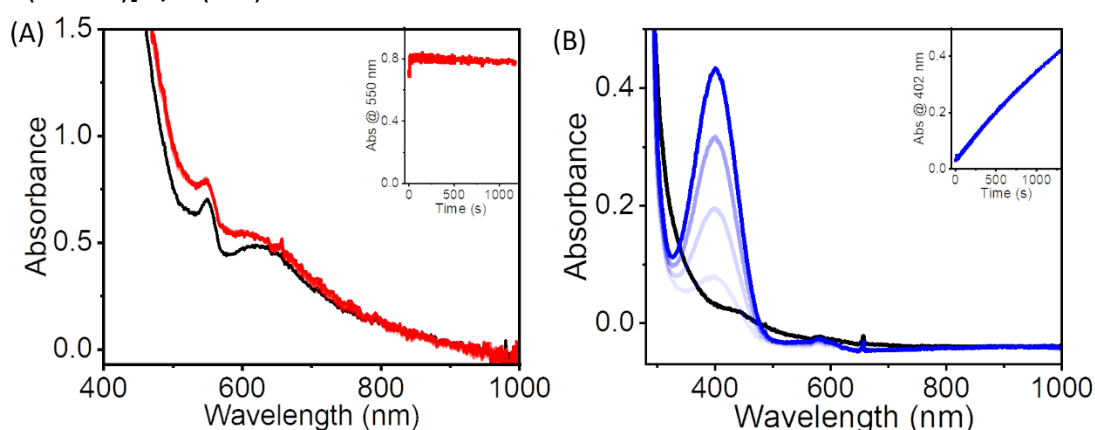

**Figure S25:** Time-dependent UV-Vis absorption spectral changes upon (A) the reaction of 1.5 mM **1** in  $\text{CH}_3\text{CN}$  with 100 eq.  $\text{H}_2\text{O}_2$ . Inset: The corresponding changes in the absorption at 550 nm over time (in seconds). (B) The reaction of 1 mM 3,5-DTBC with  $30 \mu\text{M}$  **1** in  $\text{CH}_3\text{CN}$  with 5 eq.  $\text{H}_2\text{O}_2$  under nitrogen atmosphere. Inset: The corresponding changes in the absorption at 402 nm due to the formation of 3,5-DTBQ over time (in seconds).

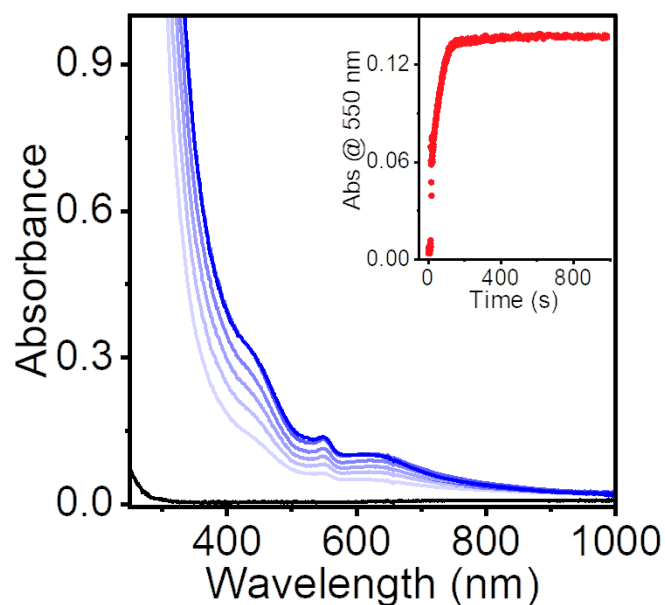

**Figure S26:** UV/Vis absorption spectral changes observed upon the reaction of 0.5 mM  $[\text{Mn}^{\text{II}}_2(\text{HPTP}^*)]^{3+}$ , **3** with 5 eq.  $\text{H}_2\text{O}_2$  under nitrogen atmosphere.

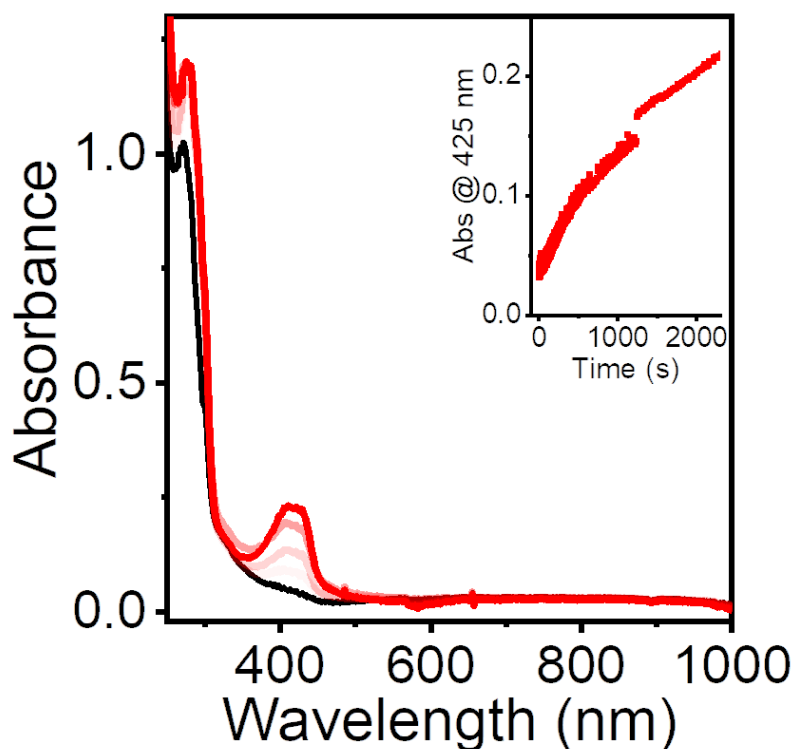

**Figure S27:** Time-dependent UV-Vis absorption spectral changes upon the reaction of 0.1 mM 2-aminophenol with 10  $\mu\text{M}$  **1** in  $\text{CH}_3\text{CN}$  with 5 eq.  $\text{H}_2\text{O}_2$  under nitrogen atmosphere. Inset: The corresponding changes in the absorption at 425 nm due to the formation of 2-amino-3*H*-phenoxazin-3-one (APX) over time (in seconds).

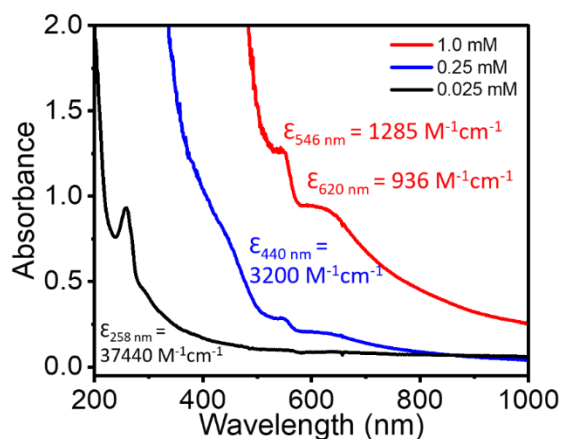

**Figure S28:** Concentration dependent UV-Vis absorption spectra of  $[\text{Mn}_4(\text{tpdp})_2(\text{O})_2(\text{H}_2\text{O})_4](\text{ClO}_4)_5$  (**4**) (where Htpdp = 1,3-bis[bis(2-pyridylmethyl)amino]-2-propanol) (1 mM red, 0.25 mM blue, and 0.025 mM black) in  $\text{CH}_3\text{CN}$  at room temperature.

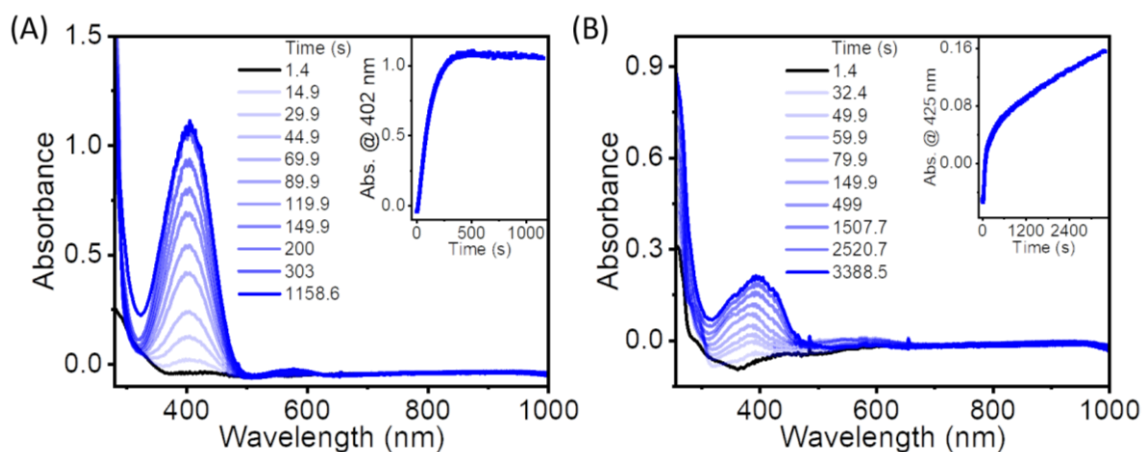

**Figure S29:** Time-dependent UV-Vis absorption spectral changes upon the reaction of (A) 1 mM 3,5-DTBC with  $30 \mu\text{M}$   $[\text{Mn}_4(\text{tpdp})_2(\text{O})_2(\text{H}_2\text{O})_4](\text{ClO}_4)_5$  (**4**) at room temperature. Inset: The corresponding absorption changes at 402 nm due to 3,5-DTBQ over time. (B) 0.1 mM Aminophenol with  $10 \mu\text{M}$  **4** along with oxygen purging at room temperature. Inset: The corresponding changes in the absorption at 425 nm (due to APX) over time.

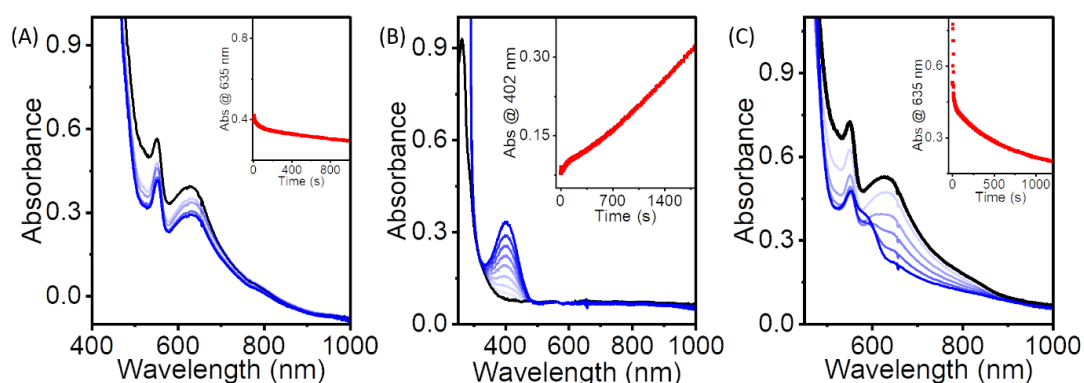

**Figure S30:** UV/Vis absorption changes upon the reaction of (A) 1.5 mM **1** with 100 eq. 3,5-DTBC at  $-40^\circ\text{C}$ . (B)  $30 \mu\text{M}$  **1** with 33 eq. 3,5-DTBC at  $-20^\circ\text{C}$ . (C) 1.5 mM **1** with 100 eq. 3,5-DTBC at  $-20^\circ\text{C}$ .



**Table S1:** Crystal data and structure refinement of **1**.

|                                                              |                                                                                                  |
|--------------------------------------------------------------|--------------------------------------------------------------------------------------------------|
| Empirical formula                                            | C <sub>78</sub> H <sub>111</sub> Cl <sub>4</sub> Mn <sub>4</sub> N <sub>12</sub> O <sub>32</sub> |
| Formula weight                                               | 2090.34                                                                                          |
| Temperature/K                                                | 100(2)                                                                                           |
| Crystal system                                               | triclinic                                                                                        |
| Space group                                                  | <i>P</i> -1                                                                                      |
| <i>a</i> /Å                                                  | 11.6386(11)                                                                                      |
| <i>b</i> /Å                                                  | 14.8042(14)                                                                                      |
| <i>c</i> /Å                                                  | 16.7878(16)                                                                                      |
| $\alpha$ /°                                                  | 95.953(2)                                                                                        |
| $\beta$ /°                                                   | 93.623(2)                                                                                        |
| $\gamma$ /°                                                  | 108.608(2)                                                                                       |
| Volume/Å <sup>3</sup>                                        | 2712.3(4)                                                                                        |
| <i>Z</i>                                                     | 1                                                                                                |
| $\rho_{\text{calc}}$ g/cm <sup>3</sup>                       | 1.280                                                                                            |
| $\mu$ /mm <sup>-1</sup>                                      | 0.628                                                                                            |
| F(000)                                                       | 1087.0                                                                                           |
| Crystal size/mm <sup>3</sup>                                 | 0.18 × 0.16 × 0.16                                                                               |
| Radiation                                                    | MoK $\alpha$ ( $\lambda$ = 0.71073)                                                              |
| 2 $\theta$ range for data collection/°                       | 4.606 to 50.094                                                                                  |
| Index ranges                                                 | -13 ≤ <i>h</i> ≤ 13, -17 ≤ <i>k</i> ≤ 17, -19 ≤ <i>l</i> ≤ 19                                    |
| Reflections collected                                        | 38201                                                                                            |
| Independent reflections                                      | 9595 [ <i>R</i> <sub>int</sub> = 0.0528, <i>R</i> <sub>sigma</sub> = 0.0571]                     |
| Data/restraints/parameters                                   | 9595/155/616                                                                                     |
| Goodness-of-fit on <i>F</i> <sup>2</sup>                     | 1.020                                                                                            |
| Final <i>R</i> indexes [ <i>I</i> ≥ 2 $\sigma$ ( <i>I</i> )] | <i>R</i> <sub>1</sub> = 0.0826, <i>wR</i> <sub>2</sub> = 0.2078                                  |
| Final <i>R</i> indexes [all data]                            | <i>R</i> <sub>1</sub> = 0.1172, <i>wR</i> <sub>2</sub> = 0.2406                                  |
| Largest diff. peak/hole / e Å <sup>-3</sup>                  | 1.14/-1.45                                                                                       |

**Table S2:** Selected Bond Lengths for **1**.

| Atom | Atom             | Length/Å   | Atom | Atom | Length/Å |
|------|------------------|------------|------|------|----------|
| Mn1  | Mn1 <sup>1</sup> | 2.7204(15) | Mn2  | O6   | 2.181(4) |
| Mn1  | O6               | 1.932(4)   | Mn2  | N6   | 2.284(4) |
| Mn1  | O5               | 1.822(4)   | Mn2  | N4   | 2.192(3) |
| Mn1  | O5 <sup>1</sup>  | 1.840(4)   | Mn2  | O7   | 2.101(5) |
| Mn1  | N5               | 2.075(4)   | Mn2  | N3   | 2.198(4) |
| Mn1  | N2               | 2.089(2)   | Mn2  | O8   | 2.290(6) |
| Mn1  | N1               | 2.116(4)   |      |      |          |

<sup>1</sup>1-X,1-Y,-Z

**Table S3:** Selected Bond Angles for **1**.

| Atom            | Atom | Atom             | Angle/°    |  | Atom            | Atom | Atom             | Angle/°    |
|-----------------|------|------------------|------------|--|-----------------|------|------------------|------------|
| O6              | Mn1  | N5               | 86.50(17)  |  | O6              | Mn2  | N6               | 78.89(16)  |
| O6              | Mn1  | N2               | 87.52(14)  |  | O6              | Mn2  | N4               | 96.28(13)  |
| O6              | Mn1  | N1               | 87.44(17)  |  | O6              | Mn2  | N3               | 100.67(16) |
| O5              | Mn1  | O6               | 97.17(17)  |  | O6              | Mn2  | O8               | 177.0(2)   |
| O5 <sup>1</sup> | Mn1  | O6               | 178.78(17) |  | N6              | Mn2  | O8               | 103.2(2)   |
| O5              | Mn1  | O5 <sup>1</sup>  | 84.0(2)    |  | N4              | Mn2  | N6               | 75.57(13)  |
| O5              | Mn1  | N5               | 176.32(19) |  | N4              | Mn2  | N3               | 141.63(15) |
| O5 <sup>1</sup> | Mn1  | N5               | 92.29(18)  |  | N4              | Mn2  | O8               | 82.30(18)  |
| O5              | Mn1  | N2               | 102.04(14) |  | O7              | Mn2  | O6               | 88.94(19)  |
| O5 <sup>1</sup> | Mn1  | N2               | 92.38(15)  |  | O7              | Mn2  | N6               | 167.6(2)   |
| O5              | Mn1  | N1               | 102.14(16) |  | O7              | Mn2  | N4               | 103.5(2)   |
| O5 <sup>1</sup> | Mn1  | N1               | 92.17(17)  |  | O7              | Mn2  | N3               | 110.9(2)   |
| N5              | Mn1  | N2               | 78.27(15)  |  | O7              | Mn2  | O8               | 88.8(3)    |
| N5              | Mn1  | N1               | 77.73(17)  |  | N3              | Mn2  | N6               | 74.33(15)  |
| N2              | Mn1  | N1               | 155.73(16) |  | N3              | Mn2  | O8               | 82.0(2)    |
| Mn1             | O6   | Mn2              | 135.68(17) |  | O5 <sup>1</sup> | Mn1  | Mn1 <sup>1</sup> | 41.76(12)  |
| Mn1             | O5   | Mn1 <sup>1</sup> | 96.0(2)    |  | O5              | Mn1  | Mn1 <sup>1</sup> | 42.28(12)  |
| N2              | Mn1  | Mn1 <sup>1</sup> | 99.66(10)  |  | O6              | Mn1  | Mn1 <sup>1</sup> | 139.45(12) |
| N1              | Mn1  | Mn1 <sup>1</sup> | 99.58(13)  |  | N5              | Mn1  | Mn1 <sup>1</sup> | 134.05(15) |

<sup>1</sup>1-X,1-Y,-Z

#### References:

- 
- [1] M. APEX2 (Version **2008**. 6-1), SAINT (V7.60A), SADABS (Version **2008**/1), XPREP (Version 2008/2). (**2005-2009**) Bruker AXS Inc., Madison.
- [2] O. V. Dolomanov, L. J. Bourhis, R. J. Gildea, J. A. K. Howard, H. Puschmann, *J. Appl. Cryst.* **2009**, *42*, 339–341.
- [3] G. M. Sheldrick, *Acta Cryst.* **2015**, *A71*, 3–8.
- [4] G. M. Sheldrick, *Acta Cryst.* **2015**, *C71*, 3–8.
- [5] S. Masatatsu, S. Hitoshi, S. Machiko, S. Toshiharu and U. Akira, *Chem. Lett.*, 1990, **19**, 923-926.
- [6] Y. Mikata, M. Wakamatsu, H. So, Y. Abe, M. Mikuriya, K. Fukui and S. Yano, *Inorg. Chem.*, 2005, **44**, 7268–7270.
